# Supplementary material
Source: PubMed Central journal article supplement (PMC3964820)

**a** Initial retracing using motorized stage

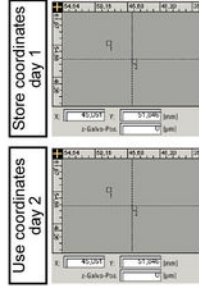

**b** Refinement of retracing based on vasculature

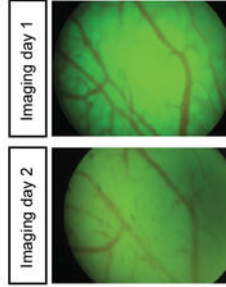

**c** Validation of retraced area based on relative position crypts

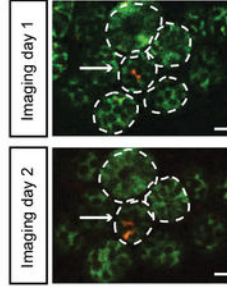

Supplement: NIHMS56127-supplement-Extended_data_figure_1.pdf [file NIHMS56127-supplement-Extended_data_figure_1.pdf]
