# Supplementary material
Source: PubMed Central journal article supplement (PMC3964820)

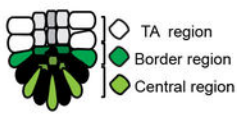

- ① Loss of clone
- ② Clone remains in the centre and spreads to the border
- ③ Clone remains in the border and spreads to the centre
- ④ Clone remains in the region of origin
- ⑤ Clone transfers from centre to border
- ⑥ Clone transfers from border to centre

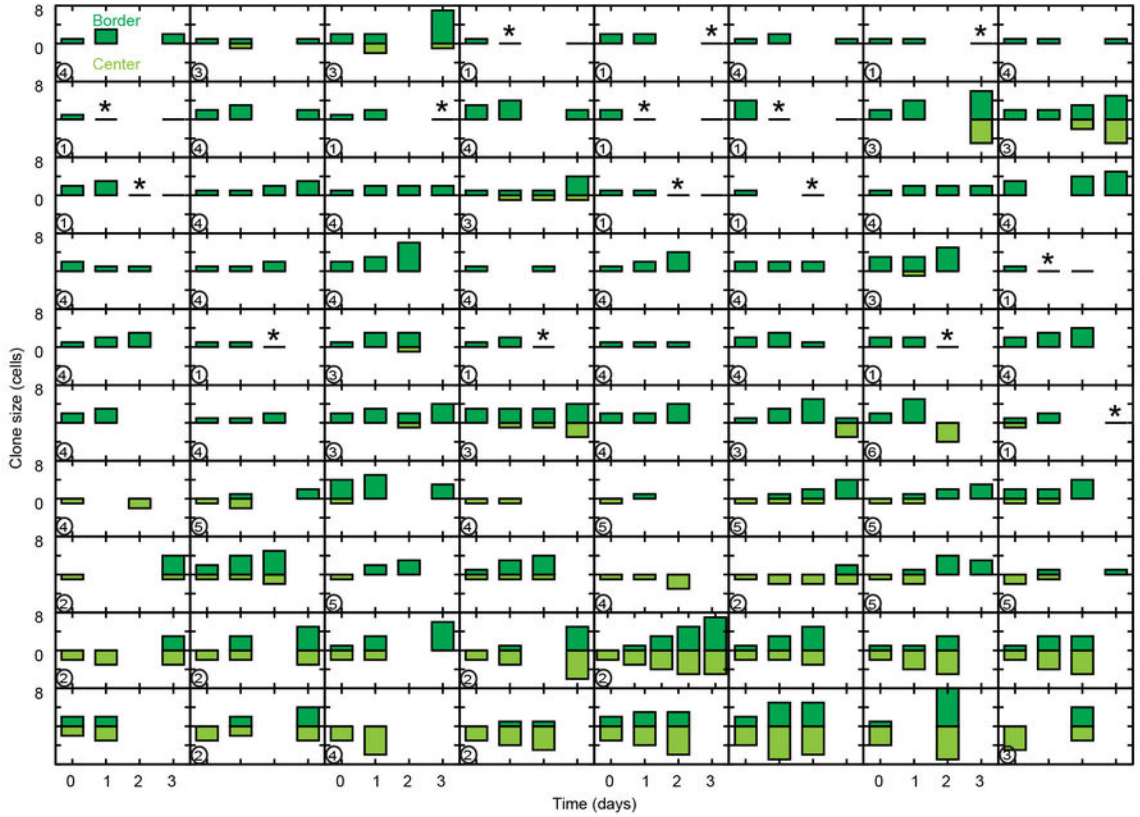

Supplement: NIHMS56127-supplement-Extended_data_figure_5.pdf [file NIHMS56127-supplement-Extended_data_figure_5.pdf]
