# Supplementary material
Source: PubMed Central journal article supplement (PMC3964820)

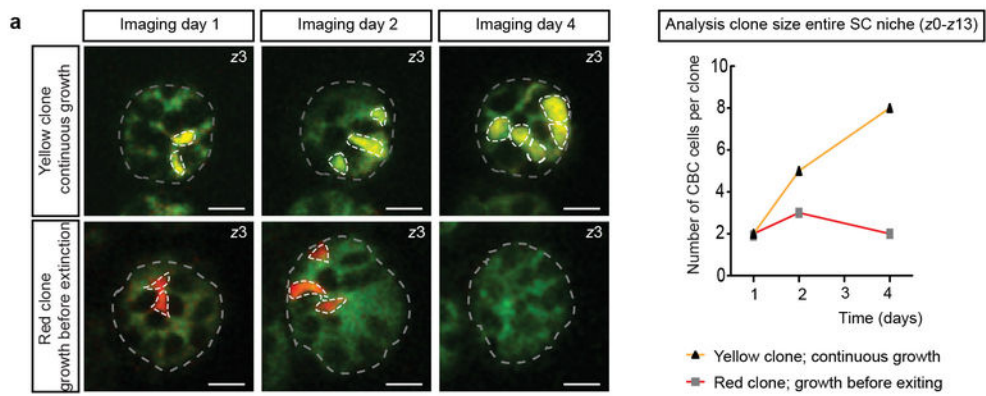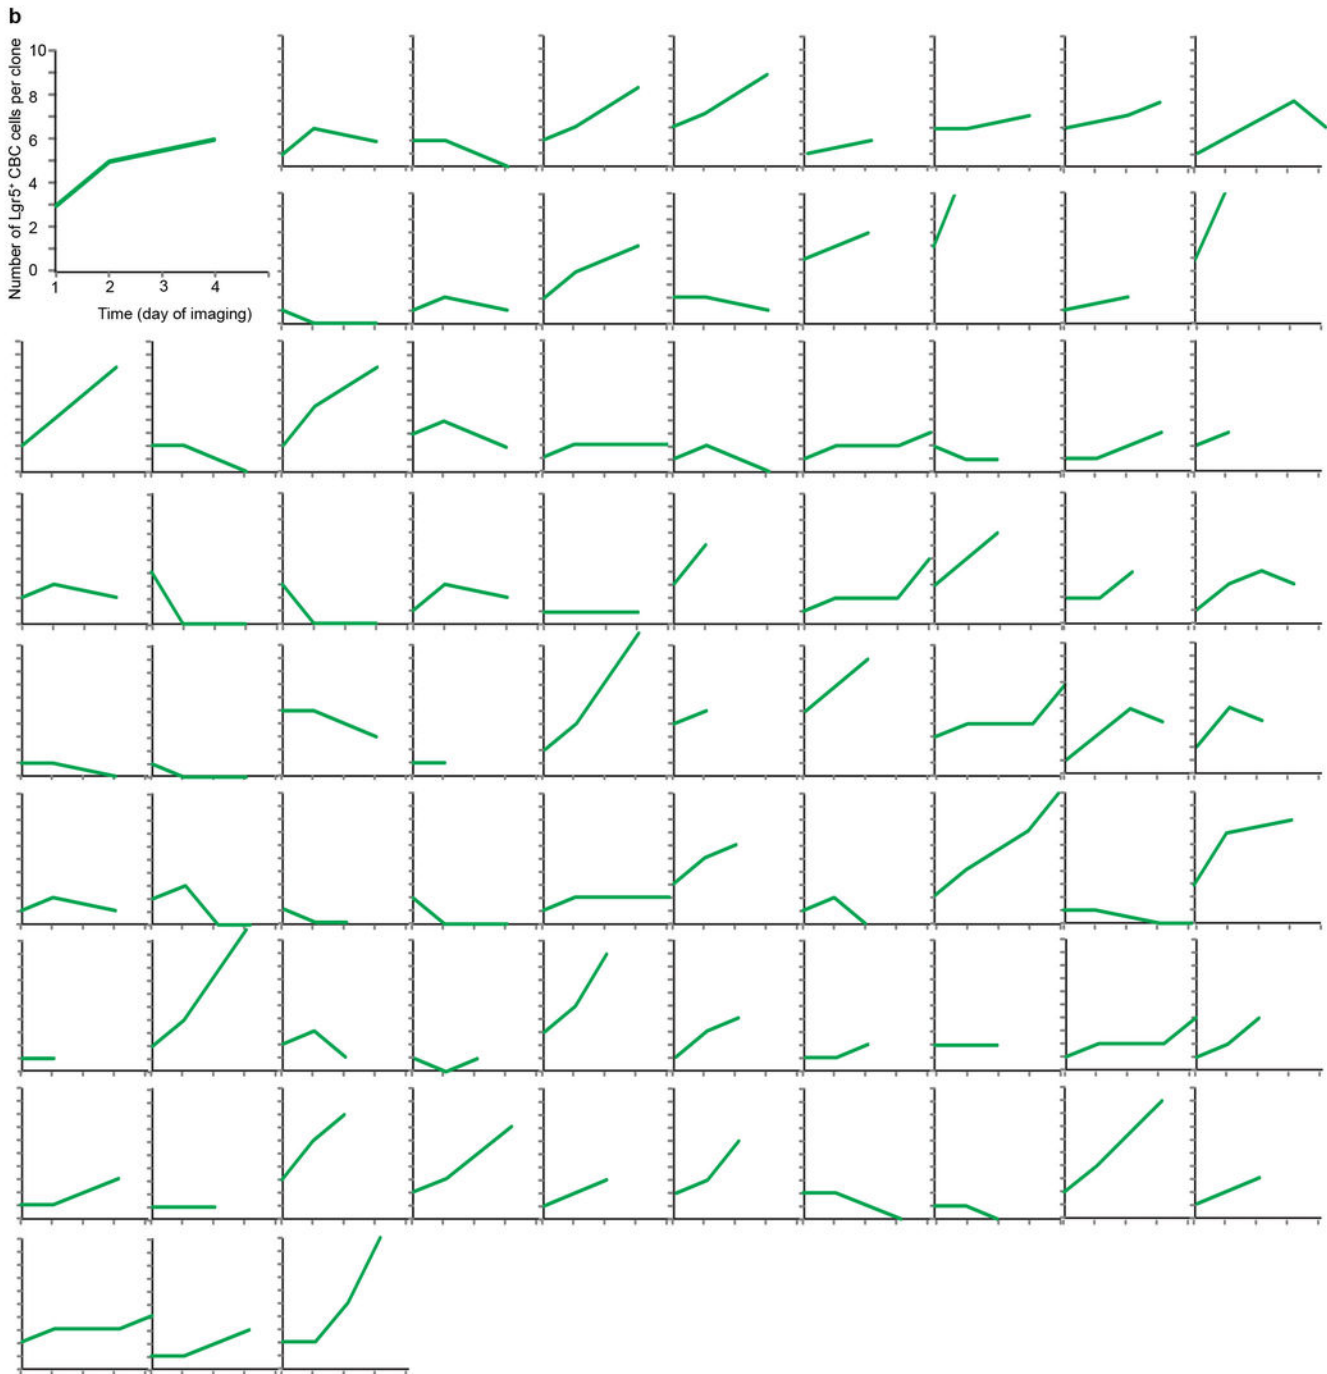

Supplement: NIHMS56127-supplement-Extended_data_figure_2.pdf [file NIHMS56127-supplement-Extended_data_figure_2.pdf]

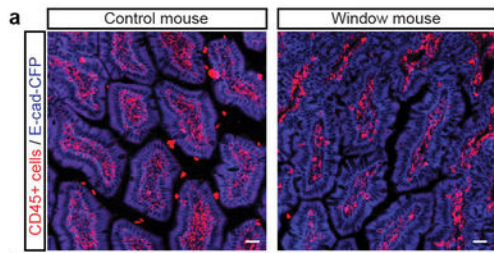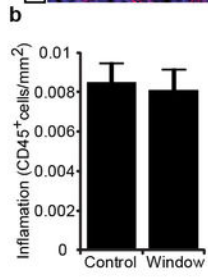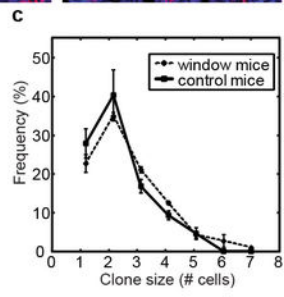

Supplement: NIHMS56127-supplement-Extended_data_figure_3.pdf [file NIHMS56127-supplement-Extended_data_figure_3.pdf]

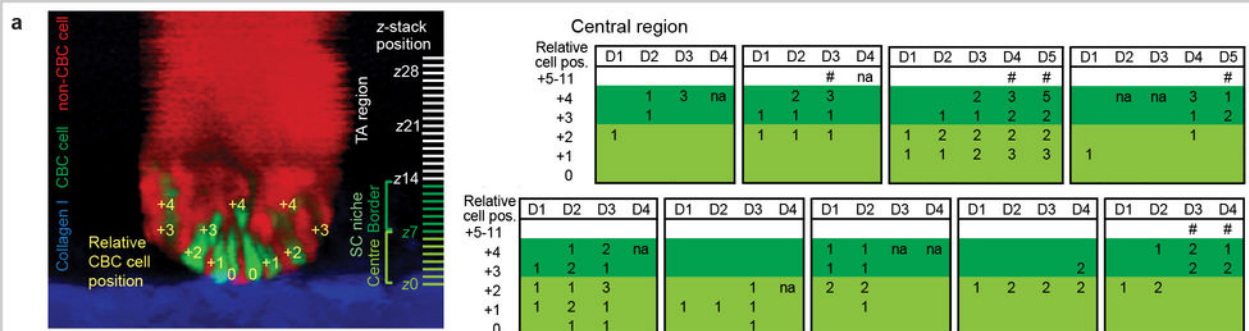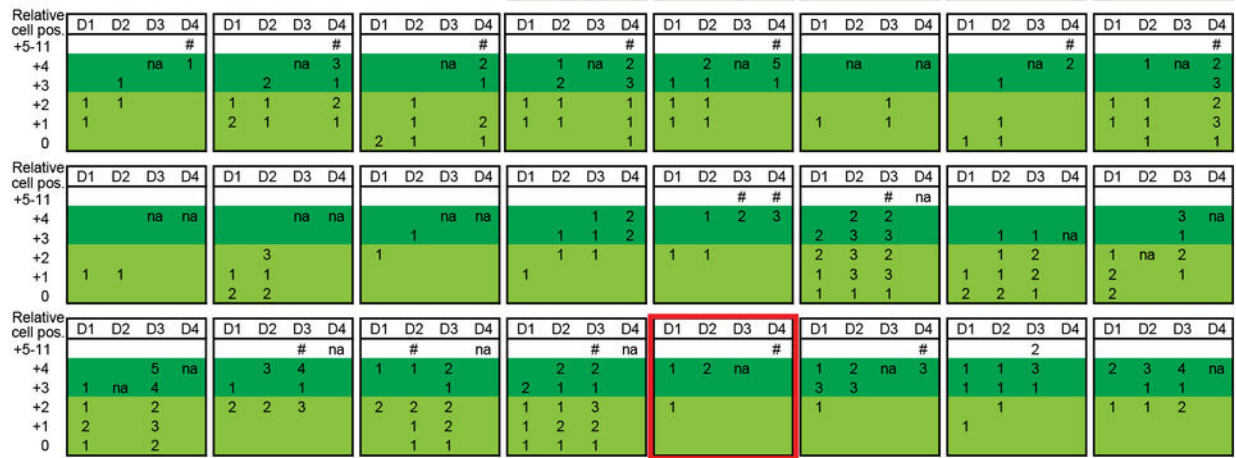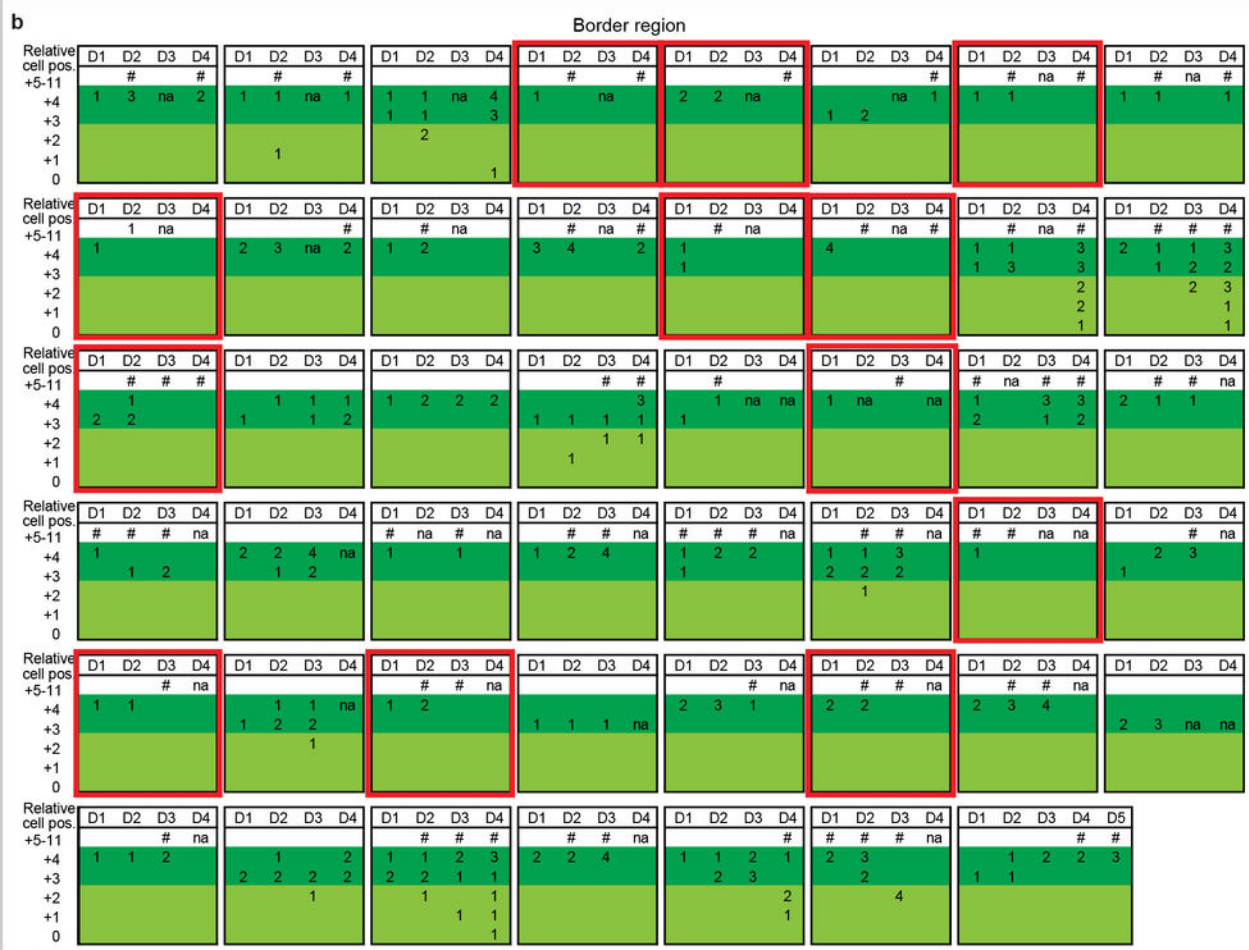

  Loss of clones originating from *Lgr5*<sup>+</sup>-Confetti cell

Supplement: NIHMS56127-supplement-Extended_data_figure_4.pdf [file NIHMS56127-supplement-Extended_data_figure_4.pdf]

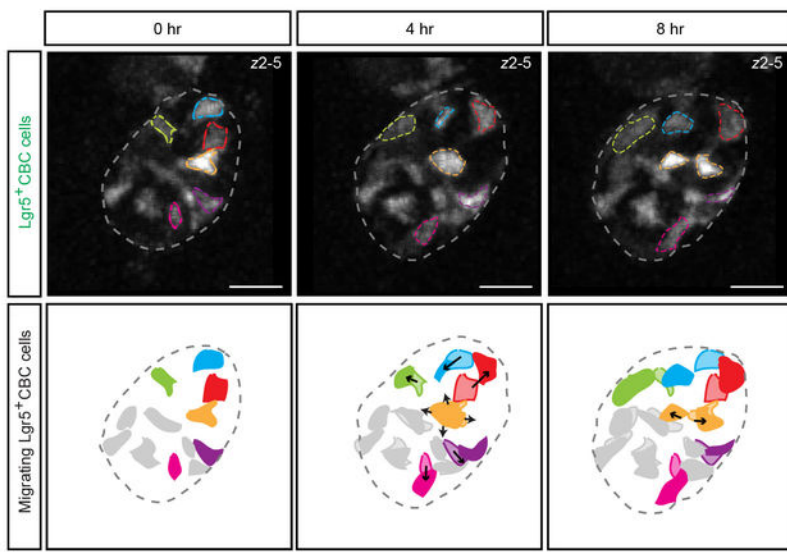

Supplement: NIHMS56127-supplement-Extended_data_figure_6.pdf [file NIHMS56127-supplement-Extended_data_figure_6.pdf]

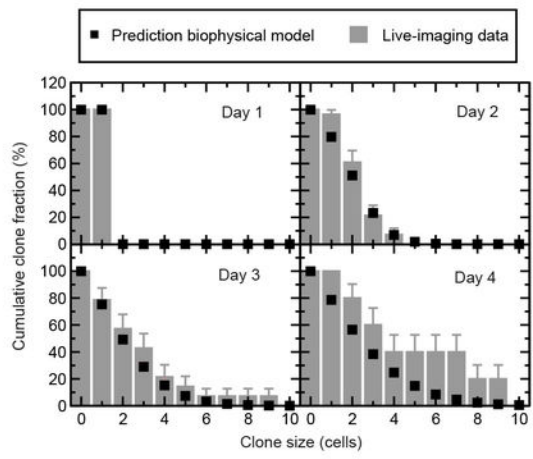

Supplement: NIHMS56127-supplement-Extended_data_figure_7.pdf [file NIHMS56127-supplement-Extended_data_figure_7.pdf]

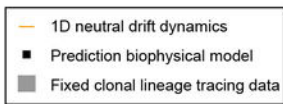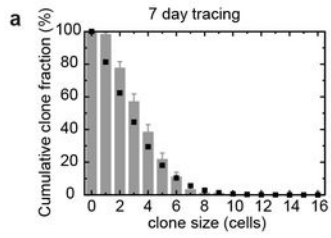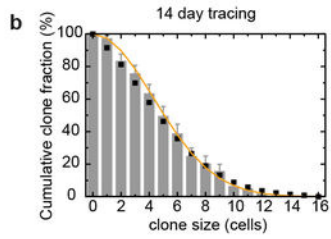

Supplement: NIHMS56127-supplement-Extended_data_figure_8.pdf [file NIHMS56127-supplement-Extended_data_figure_8.pdf]

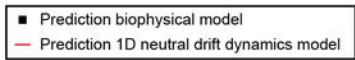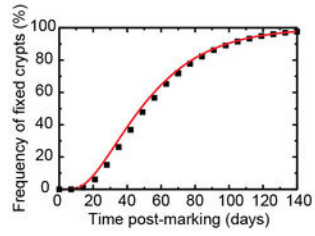

Supplement: NIHMS56127-supplement-Extended_data_figure_9.pdf [file NIHMS56127-supplement-Extended_data_figure_9.pdf]
